# Supplementary material for: Excitation-dependent efficient photoluminescence in an organic–inorganic (C4H12N)2HfCl6 perovskite induced by antimony doping
Source: Royal Society of Chemistry journal article supplement (doi:10.1039/d3qm01015e), 2023-11-06
Supplement: d3qm01015e1.pdf [file d3qm01015e1.pdf]

## Support Information

### **Excitation-dependent Efficient Photoluminescence in an Organic–Inorganic (C<sub>4</sub>H<sub>12</sub>N)<sub>2</sub>HfCl<sub>6</sub> Perovskite Induced by Antimony Doping**

Jingheng Nie<sup>‡, 1</sup>, Xiangyan Yun<sup>‡, 2</sup>, Zexiang Liu<sup>2</sup>, Hailin Zhou<sup>2</sup>, Hanlin Hu<sup>3</sup>, Haizhe Zhong<sup>2</sup>, Yumeng Shi<sup>4, \*</sup>, Henan Li<sup>4, \*</sup>

<sup>1</sup> Guangdong Rare Earth Photofunctional Materials Engineering Technology Research Center, School of Chemistry and Environment, Jiaying University, Meizhou, 514015, P. R. China

<sup>2</sup> International Collaborative Laboratory of 2D Materials for Optoelectronics Science and Technology of Ministry of Education, Institute of Microscale Optoelectronics, Shenzhen University, Shenzhen 518060, P. R. China

<sup>3</sup> Hoffman Institute of Advanced Materials, Shenzhen Polytechnic, Shenzhen 518060, P. R. China

<sup>4</sup> School of Electronics and Information Engineering, Shenzhen University, Shenzhen 518060, P. R. China

\*Y. S. E-mail: [yumeng.shi@szu.edu.cn](mailto:yumeng.shi@szu.edu.cn)

\*H. L. E-mail: [henan.li@szu.edu.cn](mailto:henan.li@szu.edu.cn)

‡ The authors contributed equally to this work.

**Table S1.** Crystallographic data and parameters of the Rietveld refinement of  $(\text{C}_4\text{H}_{12}\text{N})_2\text{Hf}_{0.95}\text{Cl}_6:0.05\text{Sb}^{3+}$  ( $(\text{TMA})_2\text{Hf}_{0.95}\text{Cl}_6:0.05\text{Sb}^{3+}$ ).

| Formula                       | $(\text{C}_4\text{H}_{12}\text{N})_2\text{Hf}_{0.95}\text{Cl}_6:0.05\text{Sb}^{3+}$ |
|-------------------------------|-------------------------------------------------------------------------------------|
| crystal system                | Cubic                                                                               |
| Temperature (K)               | 298                                                                                 |
| Space group                   | $Fd\bar{3}c$                                                                        |
| $a/\text{\AA}$                | 25.728844                                                                           |
| $b/\text{\AA}$                | 25.728844                                                                           |
| $c/\text{\AA}$                | 25.728844                                                                           |
| $\alpha$                      | 90.000                                                                              |
| $\beta$                       | 90.000                                                                              |
| $\gamma$                      | 90.000                                                                              |
| Volume/ $\text{\AA}^3$        | 17031.72                                                                            |
| $2\theta$ -interval, $^\circ$ | 5-70                                                                                |
| $R_p$                         | 7.72%                                                                               |
| $R_{wp}$                      | 9.05%                                                                               |
| $\chi^2$                      | 1.58                                                                                |

**Table S2.** Structure parameters for  $(\text{TMA})_2\text{Hf}_{0.95}\text{Cl}_6:0.05\text{Sb}^{3+}$ .

| Structure parameters |    |     |          |          |          |       |       |      |
|----------------------|----|-----|----------|----------|----------|-------|-------|------|
|                      |    |     | <i>x</i> | <i>y</i> | <i>z</i> | Occ.  | U     | Site |
| 1                    | Hf | Hf1 | 0.00000  | 0.50000  | 0.00000  | 0.950 | 0.065 | 32c  |
| 2                    | Cl | Cl1 | 0.00902  | 0.49101  | -0.09415 | 1.000 | 0.065 | 192h |
| 3                    | N  | N1  | -0.12500 | 0.62500  | 0.12500  | 1.000 | 0.052 | 48d  |
| 4                    | N  | N2  | -0.12500 | 0.37500  | -0.12500 | 1.000 | 0.170 | 16a  |
| 5                    | C  | C1  | -0.09190 | 0.60740  | 0.16840  | 1.000 | 0.063 | 192h |
| 6                    | H  | H1  | -0.07043 | 0.63554  | 0.17987  | 1.000 | 0.137 | 192h |
| 7                    | H  | H2  | -0.11347 | 0.59589  | 0.19655  | 1.000 | 0.137 | 192h |
| 8                    | H  | H3  | -0.07041 | 0.57917  | 0.15693  | 1.000 | 0.137 | 192h |
| 9                    | C  | C2  | -0.15620 | 0.40620  | -0.09380 | 1.000 | 0.061 | 64e  |
| 10                   | H  | H4  | -0.17773 | 0.38454  | -0.07243 | 1.000 | 0.318 | 192h |
| 11                   | Sb | Sb1 | 0.00000  | 0.50000  | 0.00000  | 0.050 | 0.065 | 32c  |

**Table S3.** PL decay curves for  $(\text{TMA})_2\text{Hf}_{0.95}\text{Cl}_6:0.05\text{Sb}^{3+}$  monitored at different emission wavelengths.

| Sample     | Excitation (nm) | Emission Peak (nm) | PL Lifetime (ns) |
|------------|-----------------|--------------------|------------------|
| $x = 0.05$ | 320             | 420                | 17.44            |
| $x = 0.05$ | 320             | 430                | 17.60            |
| $x = 0.05$ | 320             | 440                | 17.66            |
| $x = 0.05$ | 320             | 450                | 17.78            |
| $x = 0.05$ | 320             | 460                | 17.87            |
| $x = 0.05$ | 320             | 470                | 18.01            |
| $x = 0.05$ | 320             | 480                | 18.07            |
| $x = 0.05$ | 320             | 490                | 18.23            |
| $x = 0.05$ | 320             | 500                | 18.36            |
| $x = 0.05$ | 320             | 510                | 18.49            |
| $x = 0.05$ | 320             | 520                | 18.63            |

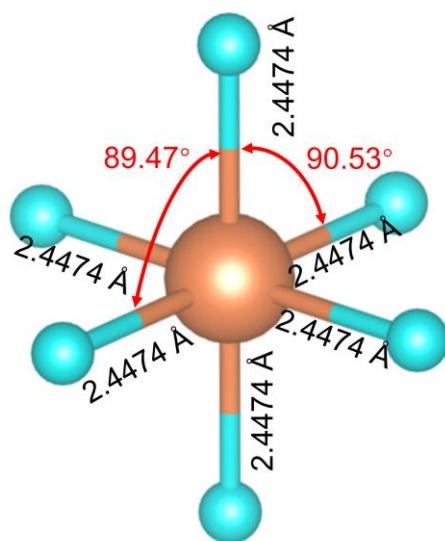

**Fig. S1.** Multiple specific lengths and included angles of Hf-Cl bond in the  $[\text{HfCl}_6]^{2-}$  octahedral structure.

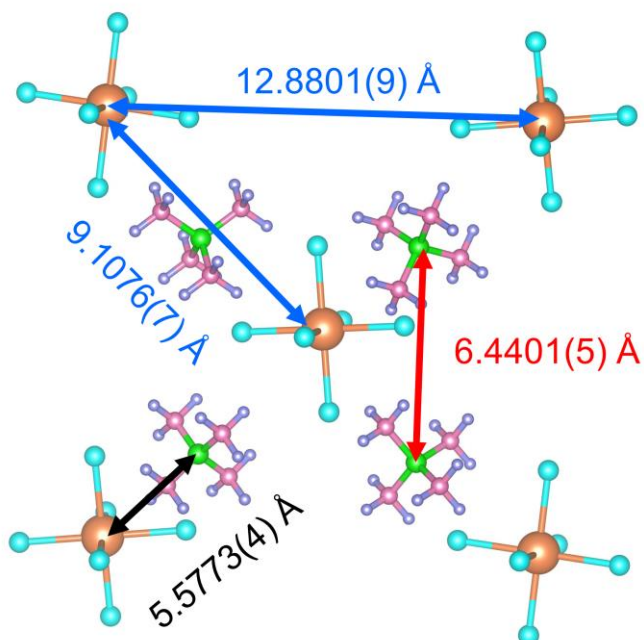

**Fig. S2.** Crystal structure features of  $(\text{TMA})_2\text{HfCl}_6$ .

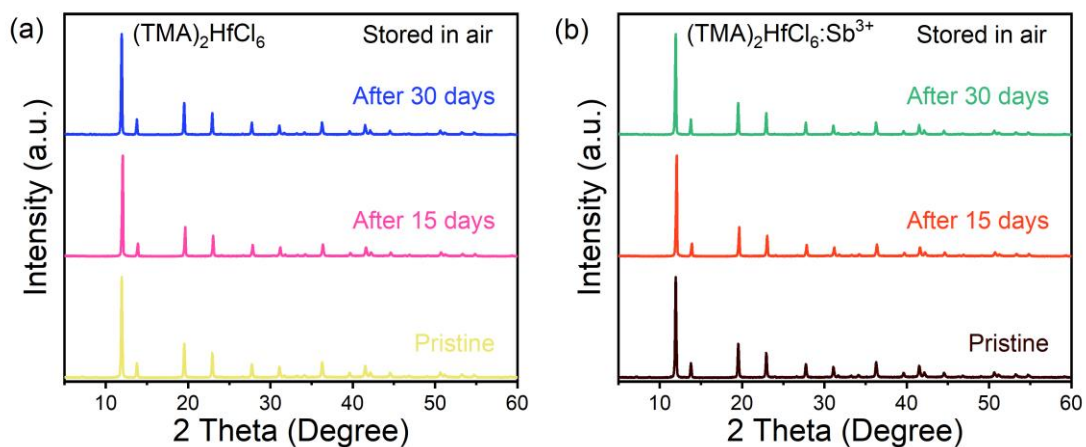

**Fig. S3.** XRD patterns of (a)  $(\text{TMA})_2\text{HfCl}_6$  and (b)  $(\text{TMA})_2\text{HfCl}_6:\text{Sb}^{3+}$  after 15 days and 30 days of exposure to light and moisture conditions.

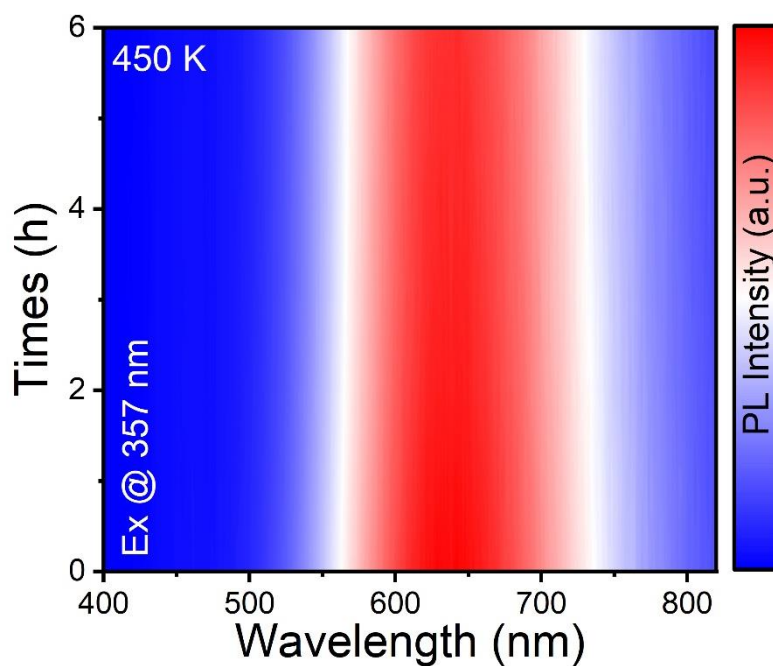

**Fig. S4.** The PL-temperature correlation map of  $(\text{TMA})_2\text{HfCl}_6:\text{Sb}^{3+}$  maintained at 450 K for 6 h.

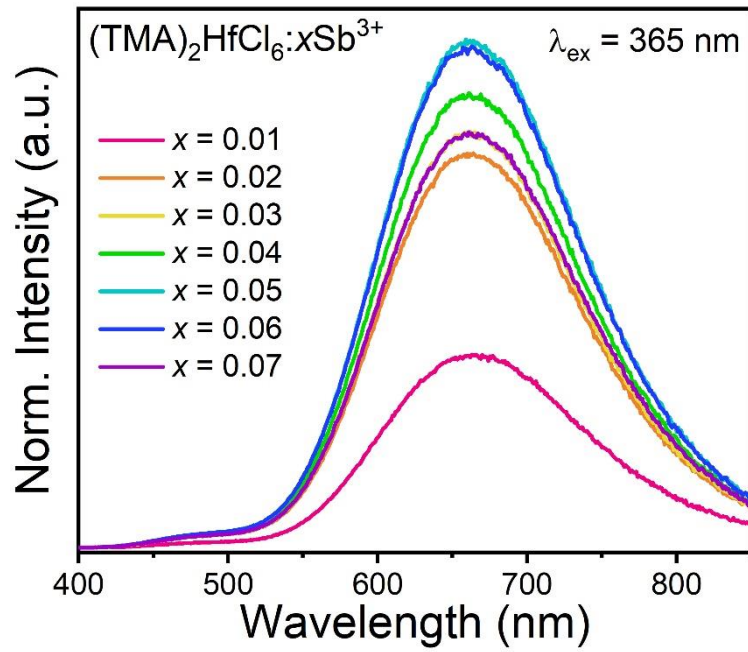

**Fig. S5.** PL spectra of  $(\text{TMA})_2\text{HfCl}_6:x\text{Sb}^{3+}$  with different  $\text{Sb}^{3+}$  concentrations at room temperature ( $\lambda_{\text{ex}} = 365 \text{ nm}$ ).

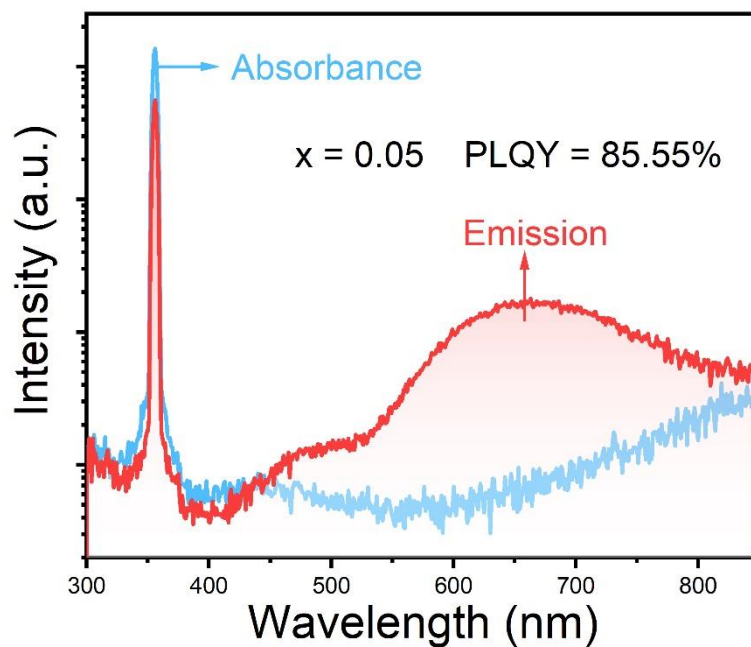

**Fig. S6.** PL spectra for PLQY of  $(\text{TMA})_2\text{HfCl}_6:0.05\text{Sb}^{3+}$  at room temperature.

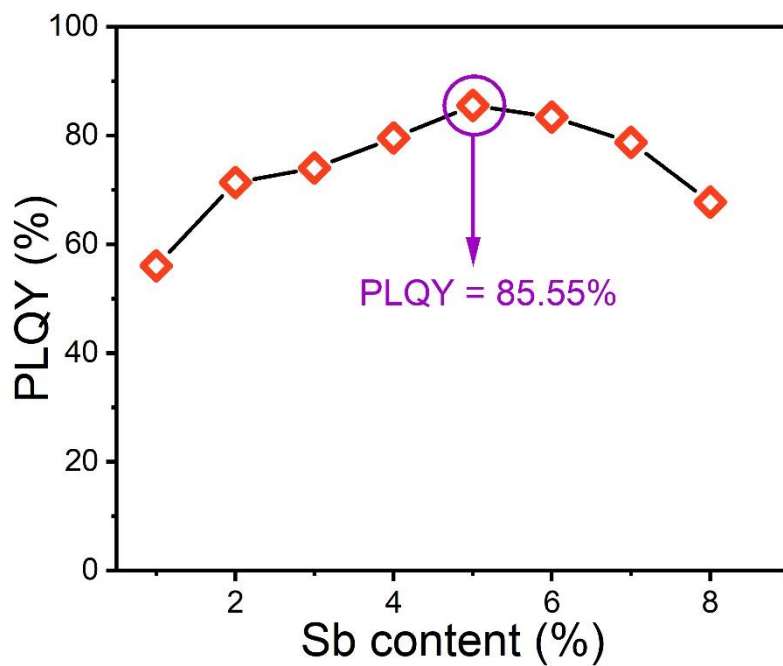

**Fig. S7.** The PLQY variation of  $(\text{TMA})_2\text{HfCl}_6:x\text{Sb}^{3+}$  with different  $\text{Sb}^{3+}$  concentrations upon excitation at 357 nm.

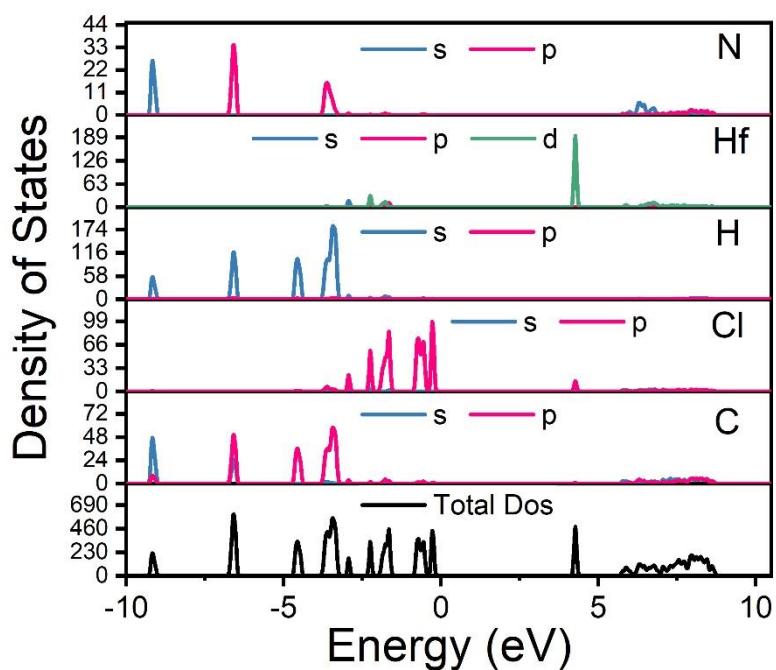

**Fig. S8.** The total and partial density of states of  $(\text{TMA})_2\text{HfCl}_6$ .



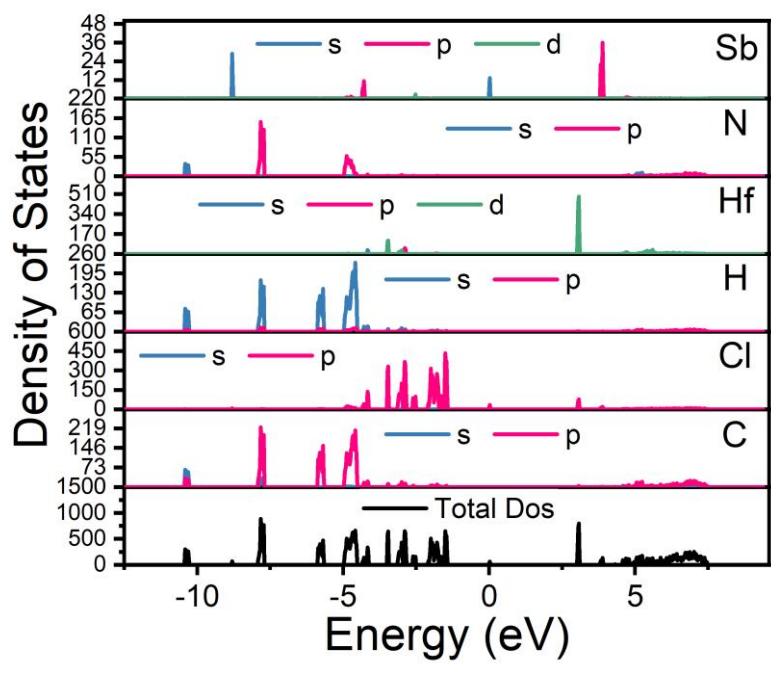

**Fig. S9.** The total and partial density of states of  $(\text{TMA})_2\text{HfCl}_6:\text{Sb}^{3+}$ .
